# Supplementary material
Source: MDPI journal article supplement (https://www.mdpi.com/2071-1050/13/11/6123)
Supplement: s1 [file s1 › Sustainability-1186760-Supplementary Information-20May.pdf]

# Environmental design features for large-scale nature-based solutions: Development of a framework that incorporates landscape dynamics into the design of nature-based solutions

Bo-Syuan Wu<sup>1</sup>, Laddaporn Ruangpan<sup>1</sup>, Arlex Sanchez<sup>1</sup>, Marzenna Rasmussen<sup>2</sup>, Eldon R. Rene<sup>1,\*</sup>, and Zoran Vojinovic<sup>1,\*</sup>

<sup>1</sup> IHE Delft Institute for Water Education, Westvest 7, P. O. Box 3015, 2601DA Delft, The Netherlands; bosyuanwu@gmail.com (B.W.); l.ruangpan@un-ihe.org (L.R.); a.sanchez@un-ihe.org (A.S.)

<sup>2</sup> Amphi International ApS, Forskerparken 10, DK-5230 Odense M, Denmark; mr@amphi.dk (M.R)

\* Correspondence: e.raj@un-ihe.org (E.R.R.); z.vojinovic@un-ihe.org (Z.V.); Tel.: +31 15 215 1840 (E.R.R.); +31 15 215 1804 (Z.V.)

## Supplementary materials:

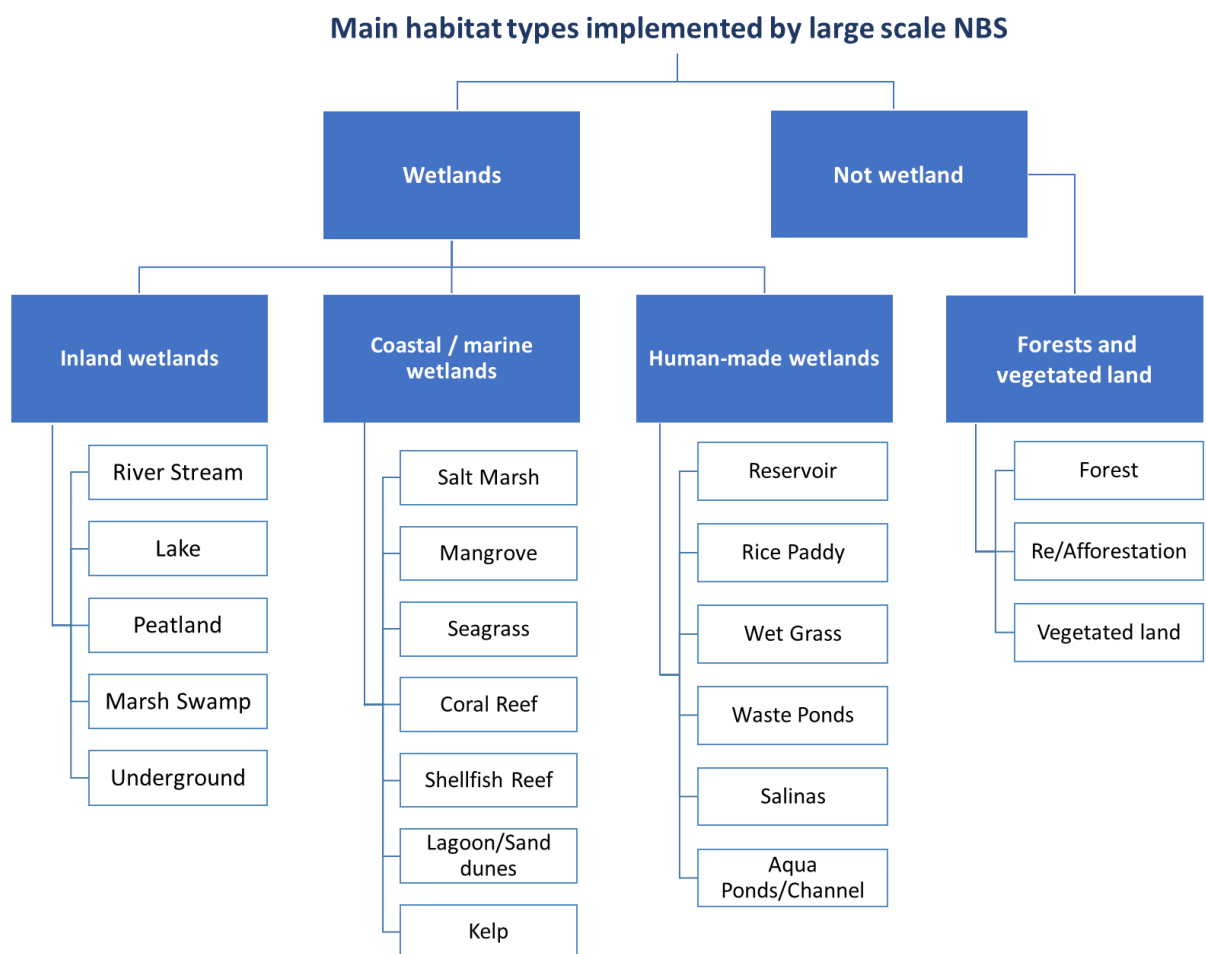

**Figure S1.** The main habitat types covered by large-scale NBS [Source: 1,2,3].

**Table S1.** The effect of implementing large-scale NBS on different habitat types: inland wetlands.

| No.      | Solutions                                                          | Inland Wetlands |      |          |             |             |
|----------|--------------------------------------------------------------------|-----------------|------|----------|-------------|-------------|
|          |                                                                    | River           | Lake | Peatland | Marsh Swamp | Underground |
| <b>1</b> | <b>Water Transport (room for the water)</b>                        |                 |      |          |             |             |
| 1.1      | Depoldering                                                        | +               | +    | +        | +           | +           |
| 1.2      | Widening of water channels                                         | +               | +    | N/A      | +           | +           |
| 1.3      | Deepening water channels                                           | +               | +    | N/A      | -           | +           |
| 1.4      | Lowering groynes                                                   | +               | N/A  | N/A      | +           | N/A         |
| 1.5      | Removing obstacles                                                 | +               | N/A  | N/A      | N/A         | N/A         |
| 1.6      | Bypass/diversion channels                                          | +               | N/A  | N/A      | N/A         | N/A         |
| 1.7      | Re-meandering and reconnection of oxbow lakes and similar features | +               | N/A  | N/A      | N/A         | N/A         |
| <b>2</b> | <b>Water Storage</b>                                               |                 |      |          |             |             |
| 2.1      | Floodplain excavation/enlargement/restoration                      | +               | +    | +        | +           | +           |
| 2.2      | Dike removal/relocation                                            | +               | +    | +        | +           | +           |
| 2.3      | Retention ponds                                                    | +               | +    | N/A      | N/A         | +/-         |
| 2.4      | Rainwater harvesting                                               | +               | +    | +        | +           | +           |
| 2.5      | Wetland restoration/enhancement                                    | +               | +    | +        | +           | +           |
| 2.6      | Detention basins                                                   | +               | +    | +        | +           | +           |
| 2.7      | Rain gardens/bio-retention area                                    | +               | +    | +        | +           | +           |
| 2.8      | Artificial wetlands                                                | +               | +    | +        | +           | +           |
| 2.9      | Stormwater detention tank                                          | N/A             | N/A  | N/A      | N/A         | +/-         |
| <b>3</b> | <b>Conveyance and Drainage Systems</b>                             |                 |      |          |             |             |
| 3.1      | Open water channels and rills                                      | +               | +    | +        | +           | +           |
| 3.2      | Vegetated ditches/dry swale                                        | N/A             | N/A  | N/A      | N/A         | +           |
| 3.3      | Bio swales                                                         | N/A             | N/A  | N/A      | N/A         | +           |
| 3.4      | Wetland channel (wet swale)                                        | N/A             | N/A  | +        | +           | +           |
| <b>4</b> | <b>Source Control</b>                                              |                 |      |          |             |             |
| 4.1      | Extensive green roofs                                              | N/A             | N/A  | N/A      | N/A         | N/A         |
| 4.2      | Intensive green roofs                                              | N/A             | N/A  | N/A      | N/A         | N/A         |
| 4.3      | Green streetscape                                                  | N/A             | N/A  | N/A      | N/A         | N/A         |
| 4.4      | Green walls                                                        | N/A             | N/A  | N/A      | N/A         | N/A         |
| 4.5      | Green deculverting                                                 | N/A             | N/A  | N/A      | N/A         | N/A         |
| 4.6      | Greening waterfronts                                               | N/A             | N/A  | N/A      | N/A         | N/A         |
| 4.7      | Permeable pavements                                                | N/A             | N/A  | N/A      | N/A         | +           |
| 4.8      | Urban trees/parks                                                  | N/A             | N/A  | N/A      | N/A         | N/A         |
| 4.9      | Forests and naturally vegetated land                               | +               | +    | N/A      | N/A         | +           |
| 4.10     | Re/Afforestation and forest conservation                           | +               | +    | N/A      | N/A         | +/-         |
| <b>5</b> | <b>Infiltration Techniques</b>                                     |                 |      |          |             |             |
| 5.1      | Restoration of nature infiltration to groundwater                  | +               | +    | +        | +           | +           |
| 5.2      | Infiltration trenches                                              | N/A             | N/A  | N/A      | N/A         | +           |
| 5.3      | Infiltration basin/surface                                         | N/A             | N/A  | N/A      | N/A         | +           |
| 5.4      | Filter trenches                                                    | N/A             | N/A  | N/A      | N/A         | +           |
| 5.5      | Filter drain                                                       | N/A             | N/A  | N/A      | N/A         | +           |
| 5.6      | Filter strips                                                      | N/A             | N/A  | N/A      | N/A         | +           |
| 5.7      | Soakways                                                           | N/A             | N/A  | N/A      | N/A         | +           |
| <b>6</b> | <b>Coastal Protection</b>                                          |                 |      |          |             |             |
| 6.1      | Sand engine                                                        | N/A             | N/A  | N/A      | N/A         | +           |
| 6.2      | Alkborough flats                                                   | N/A             | N/A  | N/A      | +           | N/A         |
| 6.3      | Rehabilitation of oyster reefs                                     | N/A             | N/A  | N/A      | N/A         | N/A         |
| 6.4      | Groynes                                                            | -               | N/A  | N/A      | N/A         | N/A         |
| 6.5      | Rich revetments                                                    | N/A             | N/A  | N/A      | N/A         | N/A         |
| 6.6      | Rehabilitation of seagrass                                         | N/A             | N/A  | N/A      | N/A         | N/A         |
| 6.7      | Rehabilitation of mangroves                                        | N/A             | N/A  | N/A      | N/A         | N/A         |
| 6.8      | Creation of beaches and dunes                                      | N/A             | N/A  | N/A      | N/A         | +           |
| 6.9      | Living breakwaters                                                 | N/A             | N/A  | N/A      | N/A         | N/A         |
| 6.10     | Rehabilitation of coral reefs                                      | N/A             | N/A  | N/A      | N/A         | N/A         |
| 6.11     | Rehabilitation of coastal marshes                                  | N/A             | N/A  | N/A      | N/A         | N/A         |

|     |                          |
|-----|--------------------------|
| +   | Positive impact          |
| -   | Negative impact          |
| N/A | Not applicable (neutral) |
| +/- | Mixed impact             |

**Table S2.** The effect of implementing large-scale NBS on different habitat types: coastal/marine wetlands.

| No.      | Solutions                                                          | Coastal/Marine Wetlands |          |           |            |                |                   |
|----------|--------------------------------------------------------------------|-------------------------|----------|-----------|------------|----------------|-------------------|
|          |                                                                    | Salt Marsh              | Mangrove | Sea-grass | Coral Reef | Shellfish Reef | Lagoon/Sand dunes |
| <b>1</b> | <b>Water Transport (room for the water)</b>                        |                         |          |           |            |                |                   |
| 1.1      | Depoldering                                                        | +                       | +        | +         | +          | +              | N/A               |
| 1.2      | Widening of water channels                                         | N/A                     | N/A      | N/A       | N/A        | N/A            | N/A               |
| 1.3      | Deepening water channels                                           | N/A                     | N/A      | N/A       | N/A        | N/A            | N/A               |
| 1.4      | Lowering groynes                                                   | N/A                     | N/A      | N/A       | N/A        | N/A            | N/A               |
| 1.5      | Removing obstacles                                                 | N/A                     | N/A      | N/A       | N/A        | N/A            | N/A               |
| 1.6      | Bypass/diversion channels                                          | N/A                     | N/A      | N/A       | N/A        | N/A            | N/A               |
| 1.7      | Re-meandering and reconnection of oxbow lakes and similar features | N/A                     | N/A      | N/A       | N/A        | N/A            | N/A               |
| <b>2</b> | <b>Water Storage</b>                                               |                         |          |           |            |                |                   |
| 2.1      | Floodplain excavation/enlargement/restoration                      | +                       | +        | +         | +          | +              | N/A               |
| 2.2      | Dike removal/relocation                                            | +                       | +        | +         | +          | +              | N/A               |
| 2.3      | Retention ponds                                                    | N/A                     | N/A      | N/A       | N/A        | N/A            | N/A               |
| 2.4      | Rainwater harvesting                                               | N/A                     | N/A      | N/A       | N/A        | N/A            | N/A               |
| 2.5      | Wetland restoration/enhancement                                    | +                       | +        | +         | +          | +              | +                 |
| 2.6      | Detention basins                                                   | +                       | +        | +         | +          | +              | N/A               |
| 2.7      | Rain gardens/bio-retention area                                    | N/A                     | N/A      | N/A       | N/A        | N/A            | N/A               |
| 2.8      | Artificial wetlands                                                | +                       | +        | +         | +          | +              | +                 |
| 2.9      | Stormwater detention tank                                          | N/A                     | N/A      | N/A       | N/A        | N/A            | N/A               |
| <b>3</b> | <b>Conveyance and Drainage Systems</b>                             |                         |          |           |            |                |                   |
| 3.1      | Open water channels and rills                                      | +                       | N/A      | N/A       | N/A        | N/A            | +                 |
| 3.2      | Vegetated ditches/dry swale                                        | N/A                     | N/A      | N/A       | N/A        | N/A            | N/A               |
| 3.3      | Bio swales                                                         | N/A                     | N/A      | N/A       | N/A        | N/A            | N/A               |
| 3.4      | Wetland channel (wet swale)                                        | +                       | N/A      | N/A       | N/A        | N/A            | +                 |
| <b>4</b> | <b>Source Control</b>                                              |                         |          |           |            |                |                   |
| 4.1      | Extensive green roofs                                              | N/A                     | N/A      | N/A       | N/A        | N/A            | N/A               |
| 4.2      | Intensive green roofs                                              | N/A                     | N/A      | N/A       | N/A        | N/A            | N/A               |
| 4.3      | Green streetscape                                                  | N/A                     | N/A      | N/A       | N/A        | N/A            | N/A               |
| 4.4      | Green walls                                                        | N/A                     | N/A      | N/A       | N/A        | N/A            | N/A               |
| 4.5      | Green deculverting                                                 | N/A                     | N/A      | N/A       | N/A        | N/A            | N/A               |
| 4.6      | Greening waterfronts                                               | N/A                     | N/A      | N/A       | N/A        | N/A            | N/A               |
| 4.7      | Permeable pavements                                                | N/A                     | N/A      | N/A       | N/A        | N/A            | N/A               |
| 4.8      | Urban trees/parks                                                  | N/A                     | N/A      | N/A       | N/A        | N/A            | N/A               |
| 4.9      | Forests and naturally vegetated land                               | N/A                     | N/A      | N/A       | N/A        | N/A            | N/A               |
| 4.10     | Re/Afforestation and forest conservation                           | N/A                     | N/A      | N/A       | N/A        | N/A            | N/A               |
| <b>5</b> | <b>Infiltration Techniques</b>                                     |                         |          |           |            |                |                   |
| 5.1      | Restoration of nature infiltration to groundwater                  | +                       | N/A      | N/A       | N/A        | N/A            | +                 |
| 5.2      | Infiltration trenches                                              | +                       | N/A      | N/A       | N/A        | N/A            | +                 |
| 5.3      | Infiltration basin/surface                                         | +                       | N/A      | N/A       | N/A        | N/A            | +                 |
| 5.4      | Filter trenches                                                    | N/A                     | N/A      | N/A       | N/A        | N/A            | N/A               |
| 5.5      | Filter drain                                                       | N/A                     | N/A      | N/A       | N/A        | N/A            | N/A               |
| 5.6      | Filter strips                                                      | N/A                     | N/A      | N/A       | N/A        | N/A            | N/A               |
| 5.7      | Soakaways                                                          | N/A                     | N/A      | N/A       | N/A        | N/A            | N/A               |
| <b>6</b> | <b>Coastal Protection</b>                                          |                         |          |           |            |                |                   |
| 6.1      | Sand engine                                                        | N/A                     | N/A      | +         | N/A        | N/A            | +                 |
| 6.2      | Alkborough flats                                                   | +                       | N/A      | +         | N/A        | N/A            | +                 |
| 6.3      | Rehabilitation of oyster reefs                                     | +                       | N/A      | N/A       | N/A        | +              | +                 |
| 6.4      | Groynes                                                            | N/A                     | -        | N/A       | -          | -              | N/A               |
| 6.5      | Rich revetments                                                    | N/A                     | +        | +         | +          | +              | +                 |
| 6.6      | Rehabilitation of seagrass                                         | N/A                     | N/A      | +         | N/A        | N/A            | N/A               |
| 6.7      | Rehabilitation of mangroves                                        | N/A                     | +        | N/A       | N/A        | N/A            | N/A               |
| 6.8      | Creation of beaches and dunes                                      | N/A                     | N/A      | N/A       | N/A        | N/A            | +                 |
| 6.9      | Living breakwaters                                                 | N/A                     | N/A      | N/A       | +          | +              | +                 |
| 6.10     | Rehabilitation of coral reefs                                      | N/A                     | N/A      | N/A       | +          | N/A            | +                 |
| 6.11     | Rehabilitation of coastal marshes                                  | +                       | N/A      | +         | N/A        | N/A            | N/A               |

**Table S3.** The effect of implementing large-scale NBS on different habitat types: human-made wetlands.

| No.      | Solutions                                                          | Human-made wetlands |            |           |             |         | Aqua Ponds/<br>Channel |
|----------|--------------------------------------------------------------------|---------------------|------------|-----------|-------------|---------|------------------------|
|          |                                                                    | Reservoir           | Rice Paddy | Wet Grass | Waste Ponds | Salinas |                        |
| <b>1</b> | <b>Water Transport (room for the water)</b>                        |                     |            |           |             |         |                        |
| 1.1      | Depoldering                                                        | N/A                 | N/A        | N/A       | N/A         | N/A     | +                      |
| 1.2      | Widening of water channels                                         | N/A                 | N/A        | N/A       | N/A         | N/A     | +                      |
| 1.3      | Deepening water channels                                           | N/A                 | N/A        | N/A       | N/A         | N/A     | +                      |
| 1.4      | Lowering groynes                                                   | N/A                 | N/A        | N/A       | N/A         | N/A     | N/A                    |
| 1.5      | Removing obstacles                                                 | N/A                 | N/A        | N/A       | N/A         | N/A     | N/A                    |
| 1.6      | Bypass/diversion channels                                          | N/A                 | N/A        | N/A       | N/A         | N/A     | N/A                    |
| 1.7      | Re-meandering and reconnection of oxbow lakes and similar features | N/A                 | N/A        | +         | N/A         | N/A     | +                      |
| <b>2</b> | <b>Water Storage</b>                                               |                     |            |           |             |         |                        |
| 2.1      | Floodplain excavation/enlargement/restoration                      | N/A                 | +          | +         | N/A         | N/A     | +                      |
| 2.2      | Dike removal/relocation                                            | N/A                 | +          | +         | N/A         | N/A     | +                      |
| 2.3      | Retention ponds                                                    | N/A                 | +          | +         | N/A         | N/A     | +                      |
| 2.4      | Rainwater harvesting                                               | +                   | +          | +         | N/A         | N/A     | +                      |
| 2.5      | Wetland restoration/enhancement                                    | +                   | +          | +         | +           | +       | +                      |
| 2.6      | Detention basins                                                   | +                   | +          | +         | N/A         | N/A     | +                      |
| 2.7      | Rain gardens/bio-retention area                                    | N/A                 | N/A        | +         | N/A         | N/A     | +                      |
| 2.8      | Artificial wetlands                                                | +                   | +          | +         | +           | +       | +                      |
| 2.9      | Stormwater detention tank                                          | +                   | N/A        | N/A       | N/A         | N/A     | +                      |
| <b>3</b> | <b>Conveyance and Drainage Systems</b>                             |                     |            |           |             |         |                        |
| 3.1      | Open water channels and rills                                      | +                   | +          | +         | N/A         | +       | +                      |
| 3.2      | Vegetated ditches/dry swale                                        | N/A                 | N/A        | +         | N/A         | N/A     | N/A                    |
| 3.3      | Bio swales                                                         | +                   | +          | +         | N/A         | +       | +                      |
| 3.4      | Wetland channel (wet swale)                                        | +                   | +          | +         | +           | +       | +                      |
| <b>4</b> | <b>Source Control</b>                                              |                     |            |           |             |         |                        |
| 4.1      | Extensive green roofs                                              | N/A                 | N/A        | N/A       | N/A         | N/A     | N/A                    |
| 4.2      | Intensive green roofs                                              | N/A                 | N/A        | N/A       | N/A         | N/A     | N/A                    |
| 4.3      | Green streetscape                                                  | N/A                 | N/A        | N/A       | N/A         | N/A     | N/A                    |
| 4.4      | Green walls                                                        | N/A                 | N/A        | N/A       | N/A         | N/A     | N/A                    |
| 4.5      | Green deculverting                                                 | N/A                 | N/A        | N/A       | N/A         | N/A     | N/A                    |
| 4.6      | Greening waterfronts                                               | N/A                 | N/A        | +         | N/A         | N/A     | +                      |
| 4.7      | Permeable pavements                                                | N/A                 | N/A        | N/A       | N/A         | N/A     | N/A                    |
| 4.8      | Urban trees/parks                                                  | N/A                 | N/A        | N/A       | N/A         | N/A     | N/A                    |
| 4.9      | Forests and naturally vegetated land                               | N/A                 | N/A        | N/A       | N/A         | N/A     | N/A                    |
| 4.10     | Re/Afforestation and forest conservation                           | N/A                 | N/A        | N/A       | N/A         | N/A     | N/A                    |
| <b>5</b> | <b>Infiltration Techniques</b>                                     |                     |            |           |             |         |                        |
| 5.1      | Restoration of nature infiltration to groundwater                  | +                   | +          | +         | N/A         | +       | +                      |
| 5.2      | Infiltration trenches                                              | +                   | +          | +         | N/A         | +       | +                      |
| 5.3      | Infiltration basin/surface                                         | +                   | +          | +         | N/A         | +       | +                      |
| 5.4      | Filter trenches                                                    | N/A                 | N/A        | N/A       | +           | N/A     | +                      |
| 5.5      | Filter drain                                                       | N/A                 | N/A        | N/A       | +           | N/A     | +                      |
| 5.6      | Filter strips                                                      | N/A                 | N/A        | N/A       | +           | N/A     | +                      |
| 5.7      | Soakaways                                                          | N/A                 | N/A        | N/A       | +           | N/A     | +                      |
| <b>6</b> | <b>Coastal Protection</b>                                          |                     |            |           |             |         |                        |
| 6.1      | Sand Engine                                                        | N/A                 | N/A        | N/A       | N/A         | N/A     | +/-                    |
| 6.2      | Alkborough flats                                                   | N/A                 | N/A        | N/A       | N/A         | N/A     | N/A                    |
| 6.3      | Rehabilitation of oyster reefs                                     | N/A                 | N/A        | N/A       | N/A         | N/A     | N/A                    |
| 6.4      | Groynes                                                            | N/A                 | N/A        | N/A       | N/A         | N/A     | N/A                    |
| 6.5      | Rich revetments                                                    | N/A                 | N/A        | N/A       | N/A         | N/A     | +                      |
| 6.6      | Rehabilitation of seagrass                                         | N/A                 | N/A        | N/A       | N/A         | N/A     | N/A                    |
| 6.7      | Rehabilitation of mangroves                                        | N/A                 | N/A        | N/A       | N/A         | N/A     | N/A                    |
| 6.8      | Creation of beaches and dunes                                      | N/A                 | N/A        | N/A       | N/A         | N/A     | N/A                    |
| 6.9      | Living breakwaters                                                 | N/A                 | N/A        | N/A       | N/A         | N/A     | N/A                    |
| 6.10     | Rehabilitation of coral reefs                                      | N/A                 | N/A        | N/A       | N/A         | N/A     | N/A                    |
| 6.11     | Rehabilitation of coastal marshes                                  | N/A                 | N/A        | N/A       | N/A         | N/A     | N/A                    |

**Table S4.** The effect of implementing large-scale NBS on different habitat types: forests and vegetated land.

| No.      | Solutions                                                          | Forests and Vegetated Land |                  |                |
|----------|--------------------------------------------------------------------|----------------------------|------------------|----------------|
|          |                                                                    | Forest                     | Re/Afforestation | Vegetated Land |
| <b>1</b> | <b>Water Transport (room for the water)</b>                        |                            |                  |                |
| 1.1      | Depoldering                                                        | N/A                        | N/A              | +/-            |
| 1.2      | Widening of water channels                                         | N/A                        | N/A              | N/A            |
| 1.3      | Deepening water channels                                           | N/A                        | N/A              | N/A            |
| 1.4      | Lowering groynes                                                   | N/A                        | N/A              | N/A            |
| 1.5      | Removing obstacles                                                 | N/A                        | N/A              | N/A            |
| 1.6      | Bypass/diversion channels                                          | N/A                        | N/A              | N/A            |
| 1.7      | Re-meandering and reconnection of oxbow lakes and similar features | N/A                        | N/A              | N/A            |
| <b>2</b> | <b>Water Storage</b>                                               |                            |                  |                |
| 2.1      | Floodplain excavation/enlargement/restoration                      | N/A                        | N/A              | N/A            |
| 2.2      | Dike removal/relocation                                            | N/A                        | N/A              | +/-            |
| 2.3      | Retention ponds                                                    | N/A                        | N/A              | N/A            |
| 2.4      | Rainwater harvesting                                               | N/A                        | N/A              | N/A            |
| 2.5      | Wetland restoration/enhancement                                    | N/A                        | N/A              | N/A            |
| 2.6      | Detention basins                                                   | N/A                        | N/A              | N/A            |
| 2.7      | Rain gardens/bio-retention area                                    | N/A                        | N/A              | N/A            |
| 2.8      | Artificial wetlands                                                | N/A                        | N/A              | N/A            |
| 2.9      | Stormwater detention tank                                          | N/A                        | N/A              | N/A            |
| <b>3</b> | <b>Conveyance and Drainage Systems</b>                             |                            |                  |                |
| 3.1      | Open water channels and rills                                      | N/A                        | N/A              | N/A            |
| 3.2      | Vegetated ditches/dry swale                                        | +                          | +                | +              |
| 3.3      | Bio swales                                                         | +                          | +                | +              |
| 3.4      | Wetland channel (wet swale)                                        | N/A                        | N/A              | N/A            |
| <b>4</b> | <b>Source Control</b>                                              |                            |                  |                |
| 4.1      | Extensive green roofs                                              | N/A                        | N/A              | +              |
| 4.2      | Intensive green roofs                                              | N/A                        | N/A              | +              |
| 4.3      | Green streetscape                                                  | N/A                        | N/A              | +              |
| 4.4      | Green walls                                                        | N/A                        | N/A              | +              |
| 4.5      | Green deculverting                                                 | N/A                        | N/A              | +              |
| 4.6      | Greening waterfronts                                               | N/A                        | N/A              | +              |
| 4.7      | Permeable pavements                                                | +                          | +                | +              |
| 4.8      | Urban trees/parks                                                  | N/A                        | +                | +              |
| 4.9      | Forests and naturally vegetated land                               | +                          | N/A              | +              |
| 4.10     | Re/Afforestation and forest conservation                           | N/A                        | +                | +              |
| <b>5</b> | <b>Infiltration Techniques</b>                                     |                            |                  |                |
| 5.1      | Restoration of nature infiltration to groundwater                  | +                          | +                | +              |
| 5.2      | Infiltration trenches                                              | +                          | +                | +              |
| 5.3      | Infiltration basin/surface                                         | +                          | +                | +              |
| 5.4      | Filter trenches                                                    | N/A                        | N/A              | N/A            |
| 5.5      | Filter drain                                                       | N/A                        | N/A              | N/A            |
| 5.6      | Filter strips                                                      | N/A                        | N/A              | N/A            |
| 5.7      | Soakaways                                                          | N/A                        | N/A              | N/A            |
| <b>6</b> | <b>Coastal Protection</b>                                          |                            |                  |                |
| 6.1      | Sand engine                                                        | N/A                        | N/A              | N/A            |
| 6.2      | Alkborough flats                                                   | N/A                        | N/A              | N/A            |
| 6.3      | Rehabilitation of oyster reefs                                     | N/A                        | N/A              | N/A            |
| 6.4      | Groynes                                                            | N/A                        | N/A              | N/A            |
| 6.5      | Rich revetments                                                    | N/A                        | N/A              | N/A            |
| 6.6      | Rehabilitation of seagrass                                         | N/A                        | N/A              | N/A            |
| 6.7      | Rehabilitation of mangroves                                        | N/A                        | N/A              | N/A            |
| 6.8      | Creation of beaches and dunes                                      | N/A                        | N/A              | N/A            |
| 6.9      | Living breakwaters                                                 | N/A                        | N/A              | N/A            |
| 6.10     | Rehabilitation of coral reefs                                      | N/A                        | N/A              | N/A            |
| 6.11     | Rehabilitation of coastal marshes                                  | N/A                        | N/A              | N/A            |

**Table S5.** Sum of scores and next steps of action.

| <b>Feedback</b>   | <b>Sum of scores</b>                                                                      | <b>Next step of action</b>                                                                                                                                                                                                                                       |
|-------------------|-------------------------------------------------------------------------------------------|------------------------------------------------------------------------------------------------------------------------------------------------------------------------------------------------------------------------------------------------------------------|
| Strongly disagree | I: General comment: 2 (scores)<br>II. Comment for Step 1: 4<br>II. Comment for Step 2: 5  | To analyze the main reason, take corrective action, and revise the framework based on the comments received from the stakeholders.                                                                                                                               |
| Disagree          | I: General comment: 3–5<br>II. Comment for Step 1: 5–11<br>II. Comment for Step 2: 6–14   | To analyze the main reason and revise the framework based on the comments received from the stakeholders.                                                                                                                                                        |
| Neutral           | I: General comment: 6<br>II. Comment for Step 1: 12<br>II. Comment for Step 2: 15         | To analyze the possible reasons. One reason could be that the explanation or introduction was not clear. Another reason could be that the interviewees are unable to give valuable answers because they do not have the required knowledge about the study area. |
| Agree             | I: General comment: 7–9<br>II. Comment for Step 1: 13–19<br>II. Comment for Step 2: 16–24 | To analyze the main reason and improve the framework based on the comments received from the stakeholders.                                                                                                                                                       |
| Strongly agree    | I: General comment: 10<br>II. Comment for Step 1: 20<br>II. Comment for Step 2: 25        | No need for any corrective action.                                                                                                                                                                                                                               |

## References

1. World Bank. *World Bank Implementing Nature-Based Flood Protection: Principles and Implementation Guidance*; World Bank: Washington, DC, USA, 2017.
2. Ramsar Convention. Ramsar Convention on Wetlands. *Global Wetland Outlook: State of the World's Wetlands and Their Services to People*; Ramsar Convention Secretariat: Gland, Switzerland, 2018.
3. Ruangpan, L.; Vojinovic, Z.; Plavšić, J.; Doong, D.-J.; Bahlmann, T.; Alves, A.; Tseng, L.-H.; Randelović, A.; Todorović, A.; Kocic, Z.; et al. Incorporating stakeholders' preferences into a multi-criteria framework for planning large-scale Nature-Based Solutions. *Ambio* 2020, 1–18, doi:10.1007/s13280-020-01419-4.
